# Supplementary material for: TRC8-dependent degradation of hepatitis C virus immature core protein regulates viral propagation and pathogenesis
Source: PubMed Central journal article supplement (PMC4857398; doi:10.1038/ncomms11379), 2016-05-04
Supplement: ncomms11379-s1.pdf [file ncomms11379-s1.pdf]

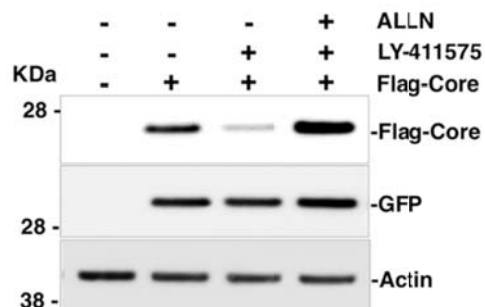

**Supplementary Figure 2.** The effects of LY-411575 and a proteasomal inhibitor on HCV core protein expression. Huh7 cells were infected with lentivirus expressing FLAG-core and then treated with LY-411575 (1.0  $\mu$ M) for 10 h in the presence or absence of a proteasome inhibitor (ALLN, 5  $\mu$ M). The cells were harvested and subjected to Western blotting using antibodies against the indicated proteins. The data are representative of three independent experiments.

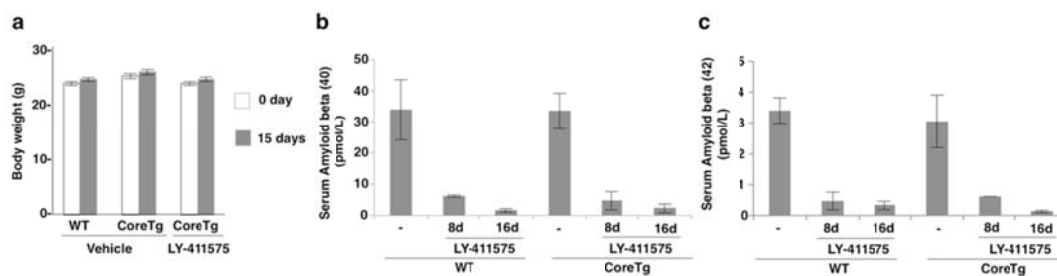

**Supplementary Figure 3.** (a) No weight loss occurred in mice following treatment with SPP. Mice (24–32 weeks old) were weighed before and after LY-411575 administration (n=6). (b, c) SPP inhibitor reduced the products of  $\gamma$ -secretase. Serum A $\beta$  (40) (b) and A $\beta$  (42) (c) levels were determined by ELISA (n=4). The data are shown as the mean  $\pm$  SE from two independent measurements of at least three mice per genotype and time point.

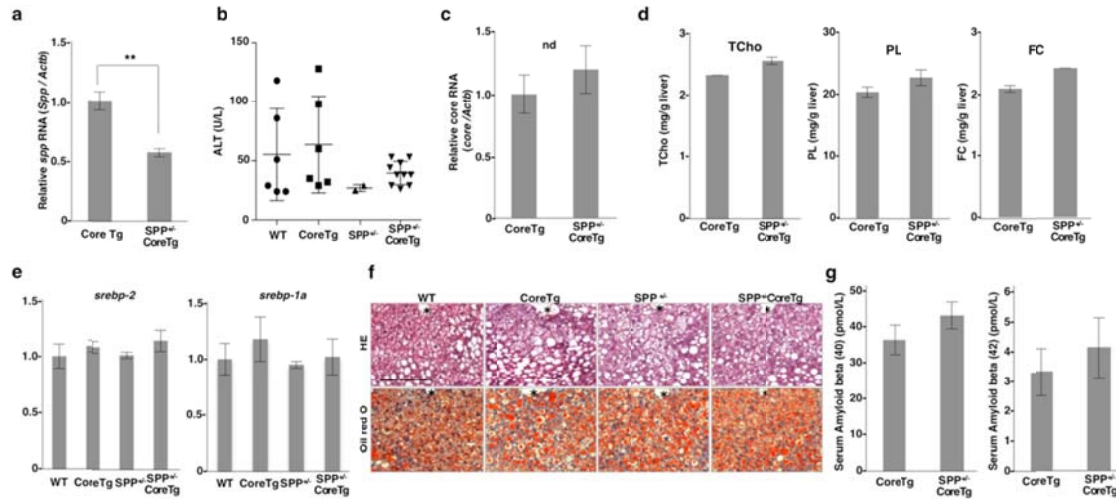

**Supplementary Figure 4.** (a) SPP mRNA expression in the livers of SPP<sup>+/-</sup>CoreTg mice was lower than that of CoreTg mice. SPP mRNA expression in the livers of CoreTg and SPP<sup>+/-</sup>CoreTg mice at the age of 24-26 weeks was determined by qPCR. (b) Haploinsufficiency of SPP did not result in a significant difference in the ALT levels. The ALT levels in the sera of the WT, CoreTg, SPP<sup>+/-</sup> and SPP<sup>+/-</sup>CoreTg mice (n=3-8 in each genotype) were determined. (c) No significant difference was observed in core mRNA expression between CoreTg and SPP<sup>+/-</sup>CoreTg mice. Total RNA was obtained from the livers of CoreTg and SPP<sup>+/-</sup>CoreTg male mice (n=4), and core mRNA expression was determined by qPCR. The data are shown as the relative expression levels after standardization by actin expression. (d) No differences were detected in the amounts of Tcho, PL and FC in the livers of CoreTg and SPP<sup>+/-</sup>CoreTg mice. The amounts of Tcho, PL and FC in the livers of CoreTg and SPP<sup>+/-</sup>CoreTg mice (24-26-weeks old, n=3 for each genotype) were determined. (e) SREBP-2 and SREBP-1a expression levels were unchanged in SPP<sup>+/-</sup>CoreTg mice. Total RNA was prepared from the livers of WT, CoreTg, SPP<sup>+/-</sup> and SPP<sup>+/-</sup>CoreTg mice (24-32-weeks old, male, n=4-6 for each genotype), and SREBP-2 and SREBP-1a expression levels were determined by qPCR. (f) SPP was not involved in diet-induced liver steatosis. WT, CoreTg, SPP<sup>+/-</sup> and SPP<sup>+/-</sup>CoreTg mice (24-weeks old) were fed a CDAA diet for 4 weeks, and liver sections were then stained with HE (upper) and Oil Red O (lower). Scale bar: 100 μm. \*: Central vein. (g) Haploinsufficiency of SPP was not involved in the production of Aβ (40) and Aβ (42). The serum Aβ (40) and Aβ (42) levels of CoreTg and SPP<sup>+/-</sup>CoreTg mice at the age of 24-26 weeks were determined by ELISA. The data represent the mean ± SE from two independent measurements of at least three mice per genotype. Images are representative of four independent mice per genotype.

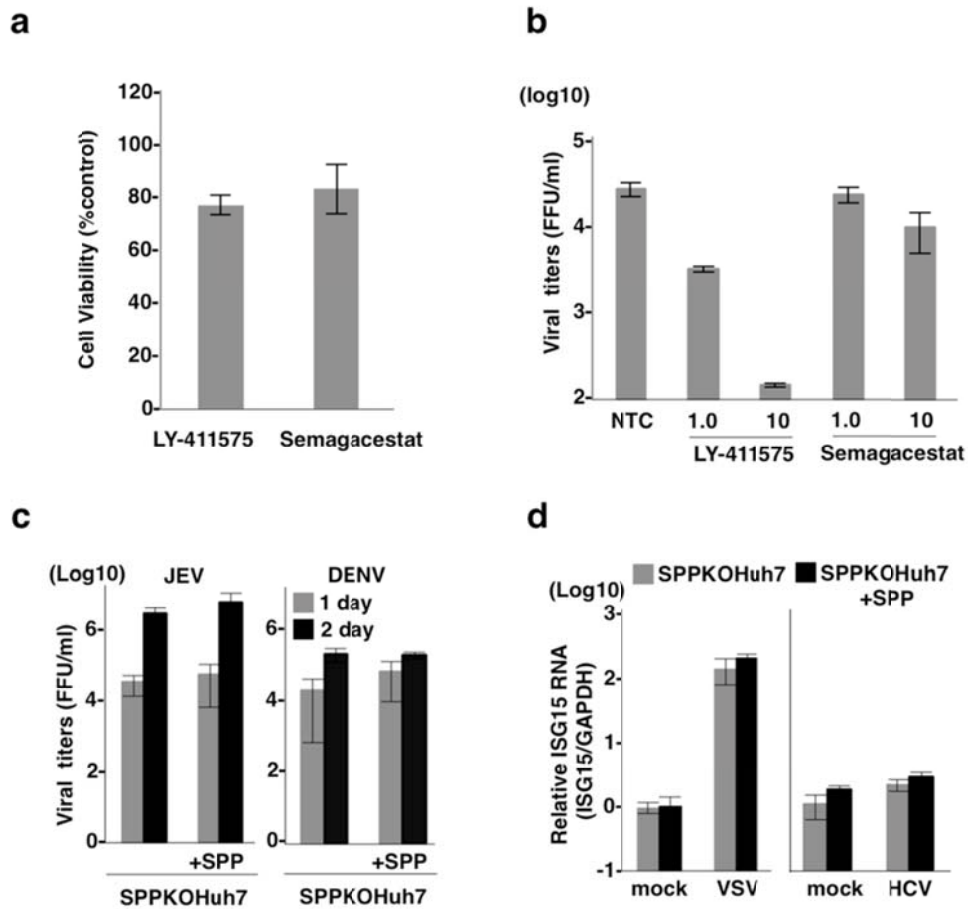

**Supplementary Figure 5** (a) LY-411575 and semagacestat exhibited no toxicity. Huh7 cells were incubated with 40  $\mu$ M of the indicated compounds for 4 days, and cell viability was determined using a CellTiter-Glo Luminescent Cell Viability Assay (Promega). The viability values were normalized to those of the non-treated control. The data represent the mean  $\pm$  SD of 2 independent experiments. (b) LY-411575, but not semagacestat, suppressed HCV release. Huh7 cells infected with HCV at an moi of 0.5 were treated with LY-411575 or semagacestat (1 or 10  $\mu$ M) for 4 days. Infectious titers in the culture supernatants were determined using a focus-forming assay. The data represent the mean  $\pm$  SD of 2 independent experiments. (c) SPP expression had no effect on the production of DENV type 4 or JEV. SPPKOHuh7 cells and those with restored SPP expression were infected with JEV and DENV at an moi of 3, and infectious titers in the culture supernatants were determined using a focus-forming assay at 4 days post-infection. The data represent the mean  $\pm$  SD of 2 independent experiments. (d) SPP was not involved in ISG15 expression. SPPKOHuh7 cells and those with restored SPP expression were infected with VSV (left) and HCV (right), and ISG15 expression levels were then determined by qPCR at 6 and 24 h post-infection, respectively. The data represent the mean  $\pm$  SD of 2 experiments performed with a cell line representative of SPPKOHuh7 cells.

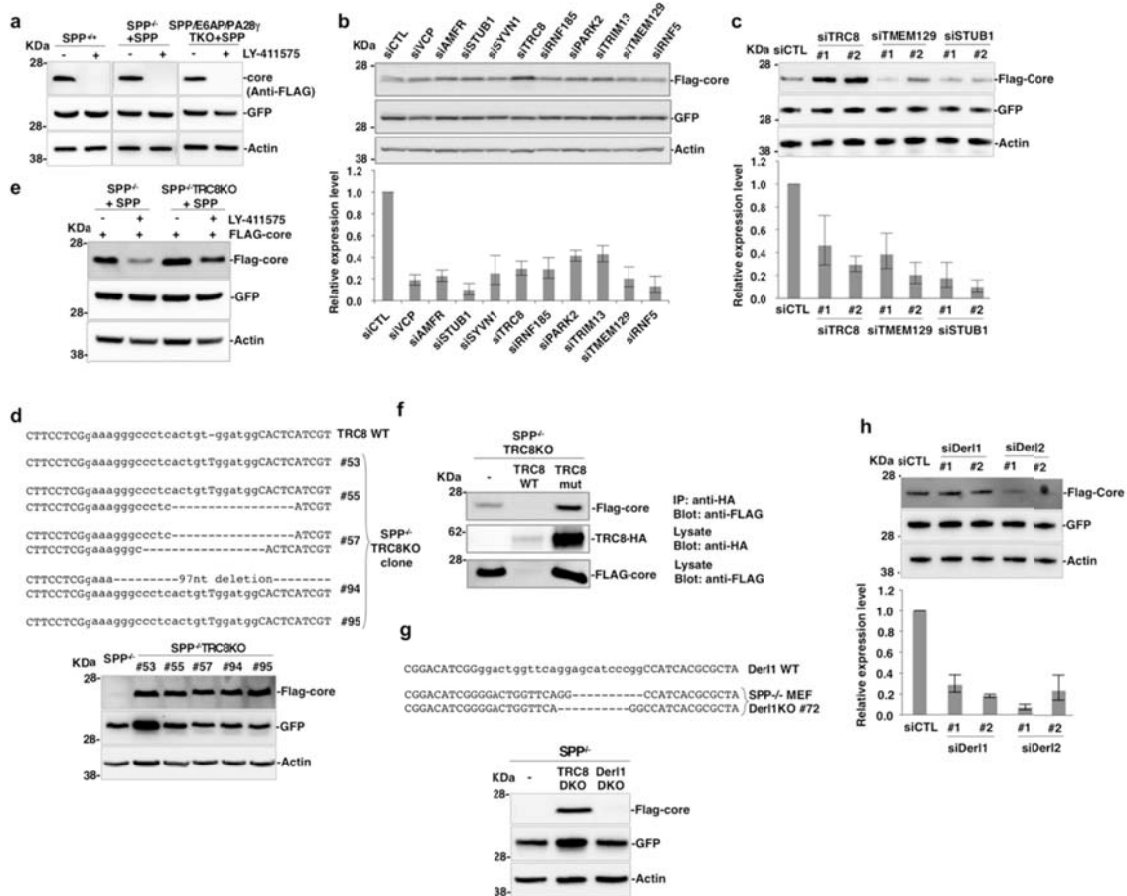

**Supplementary Figure 6** (a) Neither E6AP nor PA28 $\gamma$  were involved in the core degradation induced by an SPP inhibitor. SPP<sup>-/-</sup> and SPP/PA28 $\gamma$ /E6APTKO MEFs with restored SPP expression were infected with lentivirus expressing FLAG-core, treated with LY-411575 (1.0  $\mu$ M) at 48 h post-infection and subjected to immunoblotting. (b) TRC8 knockdown impaired core degradation in SPPKO Huh7 cells. SPPKO Huh7 cells were transfected with FLAG-core 24 h after transfection of siRNAs targeting the ERAD-associated E3 ubiquitin ligases AMFR, STUB1, SYVN1, TRC8, RNF185, PARK2, TRIM13, TMEM129 and RNF5, and VCP (AAA-ATPase p97/VCP) and were subjected to immunoblotting using antibodies against the indicated proteins (upper). Amounts of total RNA extracted from SPPKO Huh7 cells transfected with siRNA and the knockdown of each targeting gene were verified by qPCR (lower). (c) TRC8 knockdown impaired core degradation in SPPKO Huh7 cells. SPPKO Huh7 cells transfected with FLAG-core at 24 h post-transfection of two different siRNAs targeting TRC8, TMEM129 or STUB1 were subjected to immunoblotting using antibodies against the indicated proteins (upper), and knockdown of each targeting gene was verified by qPCR (lower). (d) Establishment of SPP<sup>-/-</sup>TRC8KO MEFs. Mutations of the TRC8 gene in SPP<sup>-/-</sup> MEFs (#53, #55, #57, #94 and #95) are shown (top). SPP<sup>-/-</sup> MEFs or 5 different SPP<sup>-/-</sup>TRC8KO MEF clones were infected with lentivirus expressing FLAG-core and were then subjected to immunoblotting using antibodies against the indicated proteins. (e) TRC8 was involved in core degradation induced by an SPP inhibitor. SPP<sup>-/-</sup> and SPP<sup>-/-</sup>TRC8KO MEFs with restored SPP expression expressing FLAG-core were treated with LY-411575 (1.0  $\mu$ M) at 48 h post-infection and were then subjected to immunoblotting. (f) A TRC8 mutant interacted with HCV immature core protein. SPP<sup>-/-</sup>TRC8KO MEFs and those restored with wild-type or mutant TRC8 were infected with lentivirus expressing FLAG-core, and the cell lysates were immunoprecipitated with anti-HA antibody. The immunoprecipitated samples were

subjected to SDS-PAGE and Western blotting. (g) Generation of SPP<sup>-/-</sup>Der1KO MEFs. Mutations of the Der1 gene in SPP<sup>-/-</sup> MEFs (#72) are shown (top). SPP<sup>-/-</sup>Der1KO MEFs and SPP<sup>-/-</sup> MEFs were infected with a lentivirus expressing FLAG-core and were then subjected to immunoblotting. (h) Neither Der1 nor Der2 participates in immature core protein degradation. SPPKOHuh7 cells were transfected with FLAG-core at 24 h post-transfection of siRNAs targeting Der1 and Der2, which included two independent targeting sequences, and were then subjected to immunoblotting using antibodies against the indicated proteins (upper). Amounts of total RNA extracted from SPPKOHuh7 cells transfected with siRNA and the knockdown of each targeting gene were verified by qPCR (lower). The data are representative of two (a and c-h) and three (b) independent experiments. qPCR data represent the mean  $\pm$  SD of 2 independent experiments (b, c and h).

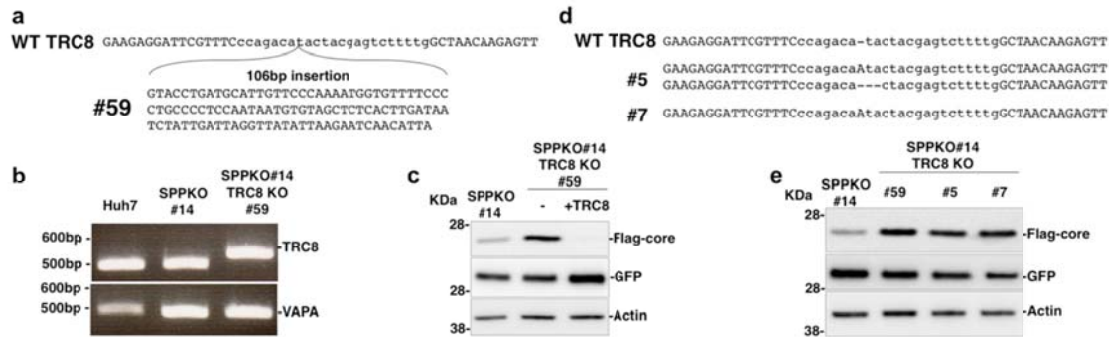

**Supplementary Figure 7** (a) Mutations of the TRC8 gene in SPPKO Huh7 cells (#59) are shown. (b) Confirmation of TRC8 deficiency by PCR. Genomic DNA was amplified using specific primers for TRC8 and VAPA. The PCR product of the TRC8 gene in SPP/TRC8DKO Huh7 cells was approximately 100 bp longer than that in the parental Huh7 cells (lower). The primers for VAPA were 5'-GTTGAGTCAGTTGTGGGACC-3' and 5'-GCAAGAAAGCAGCCGGGAAA-3'. (c) TRC8 was involved in immature core degradation in SPPKOHuh7 cells. SPPKO Huh7, SPP/TRC8DKO Huh7 and SPP/TRC8DKO Huh7 cells restored by HA-tagged TRC8 expression were infected with a lentivirus expressing FLAG-core and were then subjected to immunoblotting. (d) Mutations of the TRC8 gene in SPPKO Huh7 cells (#5, #7) are shown. (e) TRC8 was involved in immature core degradation in SPPKOHuh7 cells. SPPKO Huh7 and SPP/TRC8DKO Huh7 (#59, #5 and #7) were infected with a lentivirus expressing FLAG-core and were then subjected to immunoblotting. The data are representative of two independent experiments.

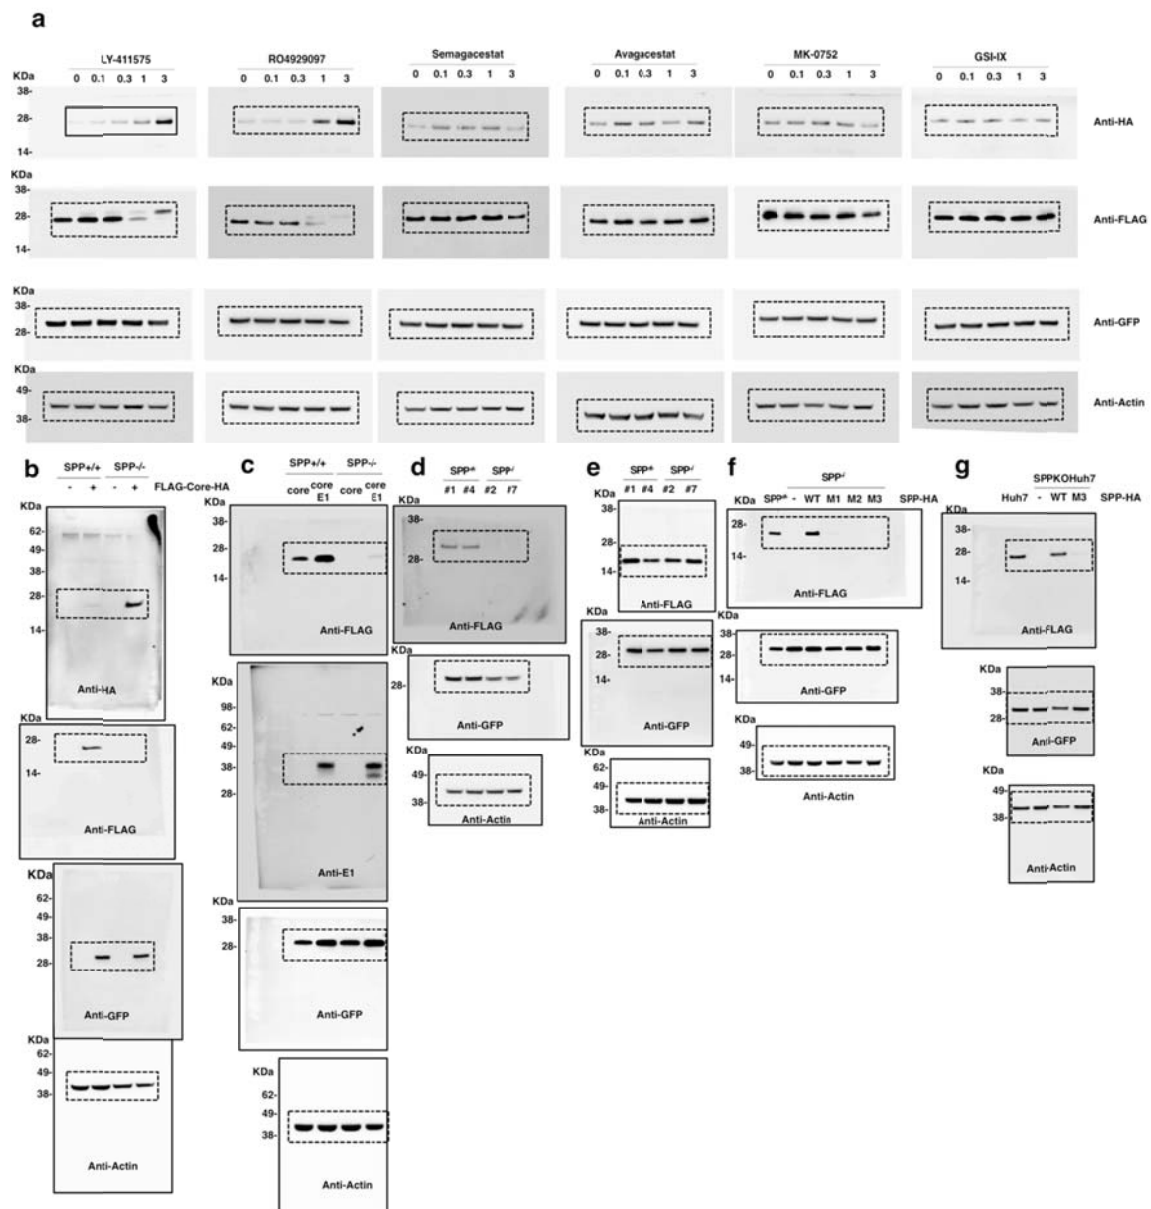

Supplementary Figure 8 : Scanned images of Western blotting data used in Figure 1. (a) Fig. 1b (b) Fig. 1e (c) Fig. 1f (d) Fig. 1g (e) Fig. 1h (f) Fig. 1i (g) Fig. 1j

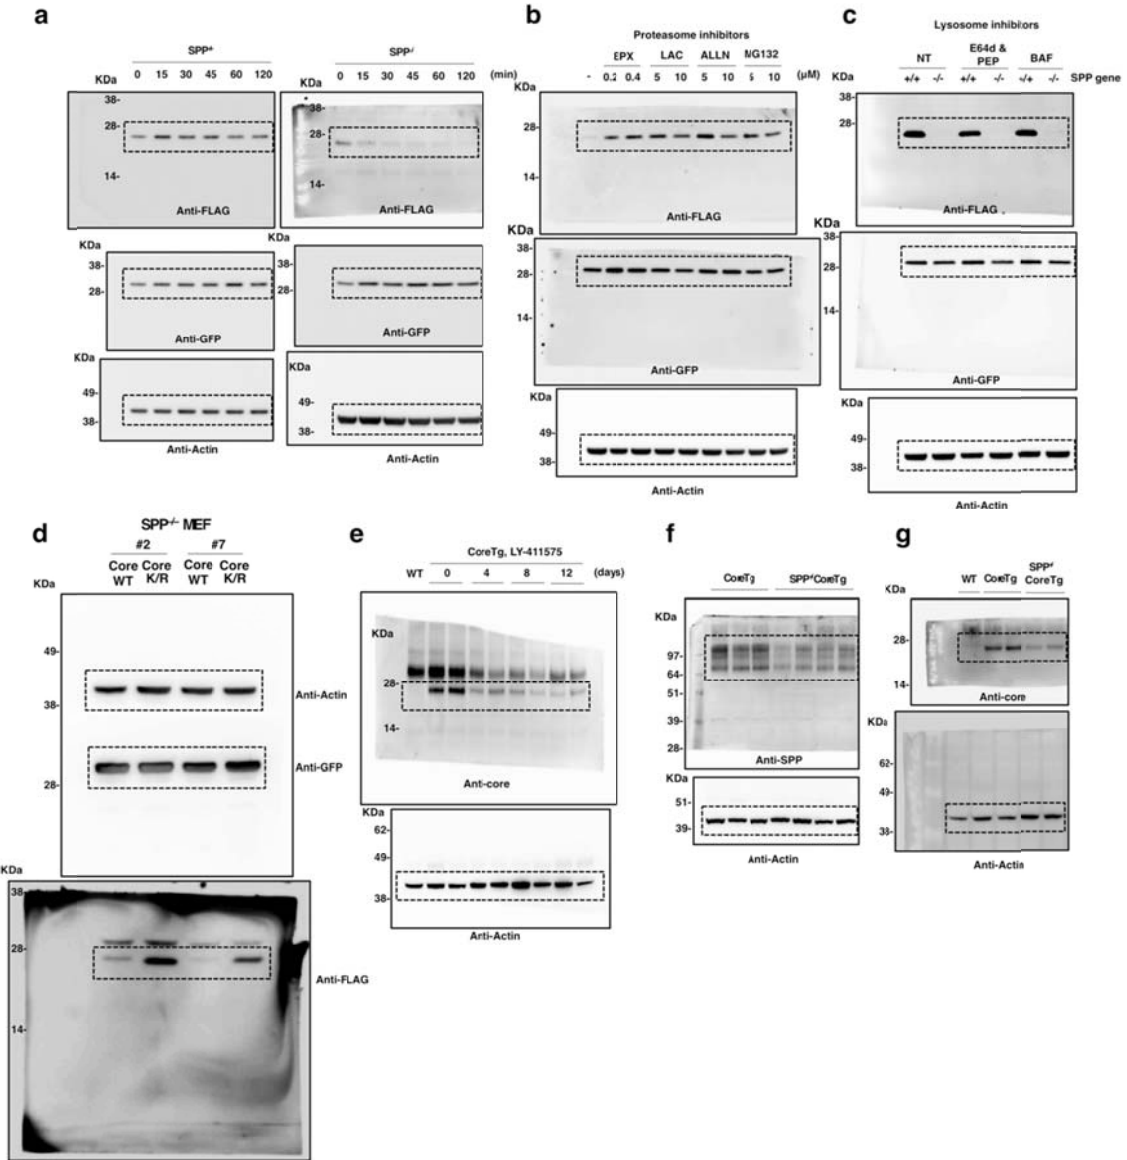

Supplementary Figure 9 : Scanned images of Western blotting data used in Figure 2-4. (a) Fig. 2a (b) Fig. 2b (c) Fig. 2c (d) Fig. 2d (e) Fig. 3c (f) Fig. 4a (g) Fig. 4b



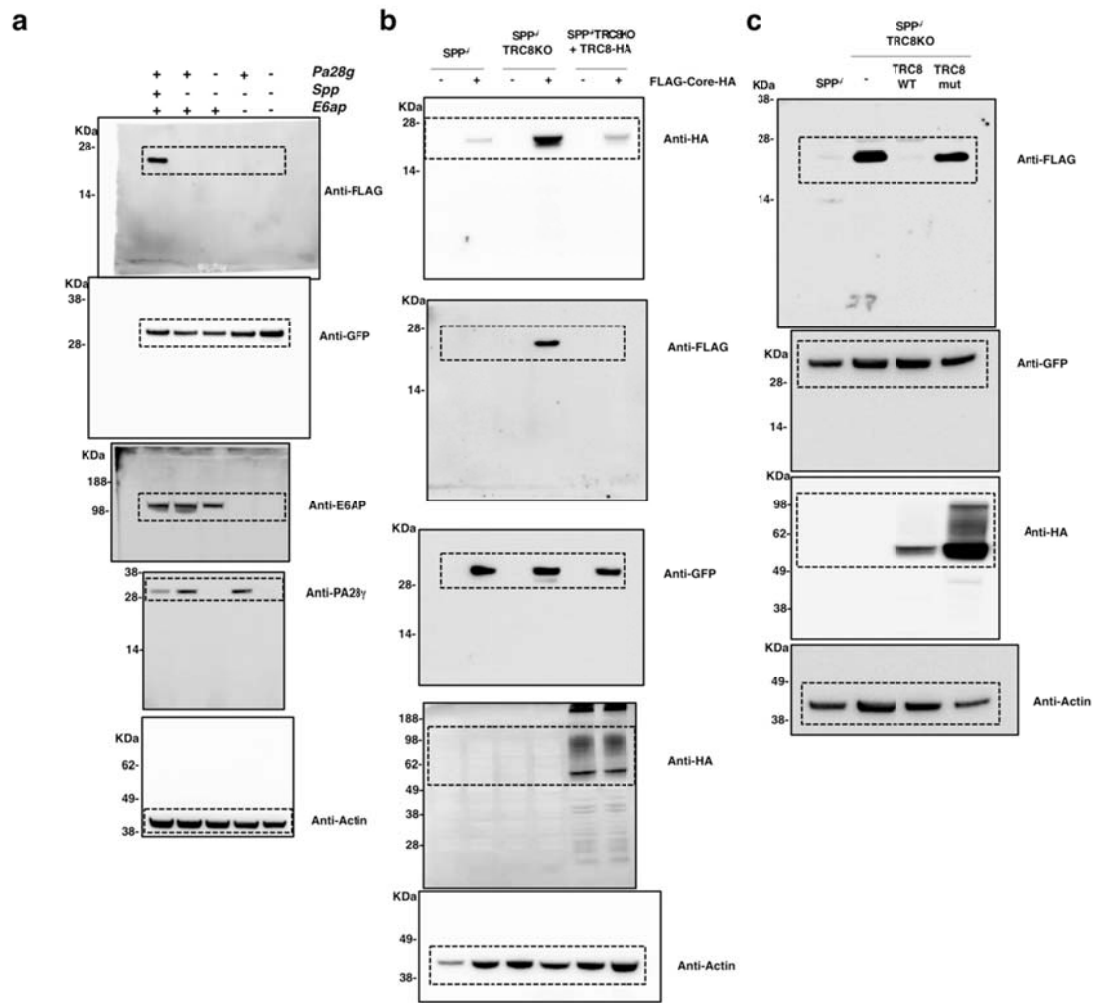

Supplementary Figure 10 : Scanned images of Western blotting data used in Figure 6. (a) Fig. 6b (b) Fig. 6c (c) Fig. 6d

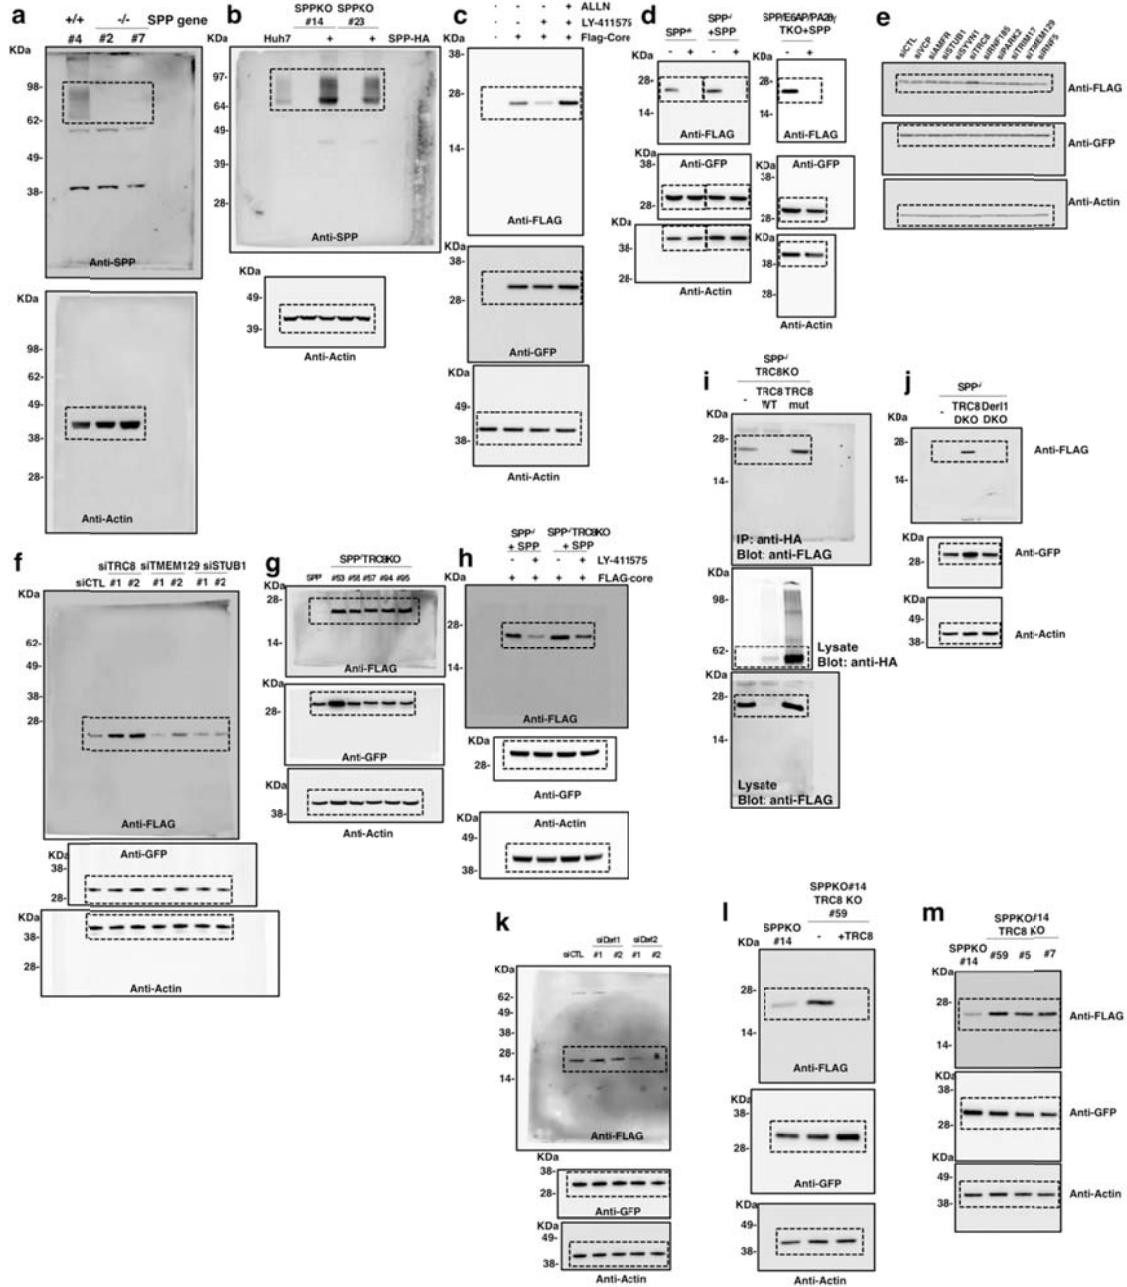

Supplementary Figure 11 : Scanned images of Western blotting data used in Supplementary

Figures. (a) Fig. S1c (b) Fig. S1f (c) Fig. S2 (d) Fig. S6a (e) Fig. S6b (f) Fig. S6c (g) Fig. S6d (h) Fig.

S6e (i) Fig. S6f (j) Fig. S6g (k) Fig. S6h (l) Fig. S7c (m) Fig. S7e

## Supplementary Table 1

### Primers used in this study

| Primer number | Primer name  | Template                                 | sequence                                                                             | Resulting plasmids                                                                                             |                 |
|---------------|--------------|------------------------------------------|--------------------------------------------------------------------------------------|----------------------------------------------------------------------------------------------------------------|-----------------|
| #165          | IRES-puro Fw | pIRES-puro3<br>(Clontech)                | ttgtagacaGGATCCaatGAATTCACGCGTGTAGCtagataact<br>gatccagtgtg                          | FUIPW                                                                                                          |                 |
| #166          | IRES-puro Rv |                                          | gcttgatatacGAATTCatccctacaaatgtggtatgg                                               | FUIPW                                                                                                          |                 |
| #349          | IRES-GFP Fw  | pMIG <sup>1</sup>                        | ttgtagacaGGATCCaatGAATTCtagatctcagagtaacgaattcc                                      | FUIGW                                                                                                          |                 |
| #347          | IRES-GFP Rv  |                                          | gcttgatatacGAATTCtactgtacagctcgtcca                                                  | FUIGW                                                                                                          |                 |
| #1089         | SPP Fw       | pcDNA3.1<br>SPP-HAer <sup>2</sup>        | aGGATCCaatGAATTCaccATGGACTCGGCCCTCAGCG                                               | FUIPW SPP-HAer                                                                                                 |                 |
| #1090         | HAer Rv      |                                          | TAGCACGCGTgaattCTATTCTCTTCTTGTATGG                                                   | FUIPW SPP-HAer                                                                                                 |                 |
| #1439         | FLAG Fw      |                                          | ttgtagacaGGATCCaccATGGACTACAAAGACGATGA                                               | FUIGW FLAG-EHcV core<br>FUIGW FLAG-JEV core<br>FUIGW FLAG-HCV core<br>FUIGW FLAG-core-HA<br>FUIGW FLAG-core-E1 |                 |
| #951          | EHcV core Rv | pcDNA3.1 EHcV<br>core <sup>3</sup>       | aGAATTCattGGATCCCTAGACCTCACAAAAGATACGGC                                              | FUIGW FLAG-EHcV core                                                                                           |                 |
| #1381         | JEV core Rv  | pCAG/FLAG-JE<br>C <sup>4</sup>           | aGAATTCattGGATCCCTAtCTTTTGTGTTTCTGCTTCTGCC                                           | FUIGW FLAG-JEV core                                                                                            |                 |
| #1516         | HCV core Rv  | pcDNA3.1<br>FLAG-core-HA <sup>2</sup>    | aGAATTCattGGATCCtaagcgaagctgggatgg                                                   | FUIGW FLAG-HCV core                                                                                            |                 |
| #1440         | HA Rv        | pcDNA3.1<br>FLAG-core-HA <sup>2</sup>    | cGAATTCattGGATCCCTTAGATGGCGTAGTCTGGGA                                                | FUIGW FLAG-core-HA                                                                                             |                 |
| #1578         | E1 Rv        | pcDNA3.1<br>FLAG-core-E1-HA <sup>2</sup> | aGAATTCattGGATCCtaCCCGTCAACGCCGGCAA                                                  | FUIGW FLAG-core-E1                                                                                             |                 |
| #1621         | TRC8 Fw      | cDNA of Huh7                             | ttgtagacaGGATCCaccatggcggccgtggggccccc                                               | FUIPW TRC8-HA<br>FUIPW TRC8mut-HA                                                                              |                 |
| #1624         | TRC8-HA Rv   |                                          | TGAATTCattggatccttaGATGGCGTAGTCTGGGACGTCGT<br>ATGGGTATCgaattctgcagatcatcattaaattctca | FUIPW TRC8-HA<br>FUIPW TRC8mut-HA                                                                              |                 |
| #1622         | TRC8mut Rv   |                                          | atagcgaatgcaGCtaccatttatttctgta                                                      | FUIPW TRC8mut-HA                                                                                               |                 |
| #1623         | TRC8mut Fw   |                                          | tgtatGCTgcaatgcctatcatgatttacaacat                                                   | FUIPW TRC8mut-HA                                                                                               |                 |
| #1106         | Core Fw OSF  |                                          | pcDNA3.1<br>FLAG-core-HA <sup>2</sup>                                                | CGATGACAAGgaattcagcacaaatcctaaaccca                                                                            | pCAGGS OSF-core |
| #1107         | Core Rv      |                                          |                                                                                      | CGATGAGCTCGAATTCtaagcgaagctgggatgg                                                                             | pCAGGS OSF-core |
| #1110         | OSF Fw       | pCAG OSF <sup>5</sup>                    | attttgcaagaataaccATGGCTAGCTGGAGCCACCC                                                | pCAGGS OSF-core                                                                                                |                 |
| #1111         | OSF Rv core  |                                          | tttaggattgtgctgaattCTTGTATCGTCATCCTTGT                                               | pCAGGS OSF-core                                                                                                |                 |

## Supplementary Table 2

### DNA oligos for generating gene-knockout cell lines.

|             |                                                                                                                                                      |
|-------------|------------------------------------------------------------------------------------------------------------------------------------------------------|
|             | Target sequence for Cas9<br>Forward primer for cloning into pCAG EGxxFP and sequencing<br>Reverse primer for cloning into pCAG EGxxFP and sequencing |
| Human SPP   | 5'-GCCCTCAGCGATCCGCATAACGG-3'<br>5'-CAACCACTGAGGATCCCACGTCACTTCCTGTTGCCTTAG-3'<br>5'-TGCCGATATCGAATTCGGTTGGATGGTAGTTAAGAGAGGA-3'                     |
| Mouse PA28γ | 5'-GACACGGCCCGCCTGGCCATGG-3'<br>5'-CAACCACTGAGGATCCCCAGGAACCTGTAGAAGTGAAG-3'<br>5'-TGCCGATATCGAATTCCTATAACGGTCCCTCTCCAATGC-3'                        |
| Mouse E6AP  | 5'-CCTCATCCCTCCAAGAAAGGAGC-3'<br>5'-CAACCACTGAGGATCCTTGCCTTATCTGTTGGGCTTTG-3'<br>5'-TGCCGATATCGAATTCACAGTCTTTACCACAGTTTACCAG-3'                      |
| Mouse Der1l | 5'-GGACTGGTTCAGGAGCATCCCCGG-3'<br>5'-CAACCACTGAGGATCCTGATCGCTGCCTAGCTTGTC-3'<br>5'-TGCCGATATCGAATTCACACTACAGATCCCACCAGCC-3'                          |
| Mouse TRC8  | 5'-GAAAGGGCCCTCACTGTGGATGG-3'<br>5'-CAACCACTGAGGATCCGCCTTTCTATTAGCTGCAACTTC-3'<br>5'-TGCCGATATCGAATTCCTGCCAAGACAAGCACTGTG-3'                         |
| Human TRC8  | 5'-CCAGACATACTACGAGTCTTTTG-3'<br>5'-CAACCACTGAGGATCCGTCCTGGCAGTGAAACTGAAG-3'<br>5'-TGCCGATATCGAATTCCAACAAAGCCAAGACGCCTG-3'                           |

## Supplementary Table 3

### siRNAs used in this study

|             | siRNA ID | Sequence (+ TT)                                                |
|-------------|----------|----------------------------------------------------------------|
| siCTL       |          | Silencer Select Negative Control No. 1 siRNA (cat no. 4390843) |
| siVCP       | s14765   | <b>GAAUAGAGUUGUUCGGAAUTT</b>                                   |
| siAMFR      | s1322    | <b>GCUCUGCAAGGAUCGAUUUTT</b>                                   |
| siSTUB1-1   | s195025  | <b>GUCUGUUCGUGGGCCGAAATT</b>                                   |
| siSTUB1-2   | s195027  | <b>CCAAUCUGCAGCGAGCUUATT</b>                                   |
| siSYVN1     | s39021   | <b>GCAUUGUCUCUCUUAUGUUTT</b>                                   |
| siTRC8-1    | s22178   | <b>GGGAAAAGCUUGACGAUUATT</b>                                   |
| siTRC8-2    | s22179   | <b>GUAUCGAAUUACGGAUUATT</b>                                    |
| siRNF185    | s40665   | <b>CAUCAGUGGUUGGAGACCATT</b>                                   |
| siPARK2     | s224170  | <b>CCAACUCCUUGAUUAAAGATT</b>                                   |
| siTRIM13    | s19898   | <b>GAGUUUAGAGAGAAAAUCATT</b>                                   |
| siTMEM129-1 | s40916   | <b>GACGUGCACCUGACUGUGATT</b>                                   |
| siTMEM129-2 | s40917   | <b>CCCGUGUGAUUGUGACAGATT</b>                                   |
| siRNF5      | s12076   | <b>CCACCGUCUCAAUGCCATT</b>                                     |

## Supplementary Table 4

### Primers for qPCR

|                      | Forward primer<br>Reverse primer                                            |
|----------------------|-----------------------------------------------------------------------------|
| Human GAPDH          | 5'-TGTAGTTGAGGTCAATGAAGGG-3'<br>5'-ACATCGCTCAGACACCATG-3'                   |
| Human ISG15          | 5'-AGCGAACTCATCTTTGCCAGTACA-3'<br>5'-CAGCTCTGACACCGACATGGA-3'               |
| Mouse $\beta$ -actin | 5' - TTGCTGACAGGATGCAGAAG -3'<br>5' - GTAAGTGGCGCTCAGGAGGAG -3'             |
| Mouse SPP            | 5' - TTTCTTCGTGCTGGGGATCC -3'<br>5' - CCTGTGTGAAGAGCAGCTGA -3'              |
| Mouse SREBP-1a       | 5' - CACAGCGTTTTGAACGAC -3'<br>5' - CTGGCTCCTCTTTGATCCCA -3'                |
| Mouse SREBP-1c       | 5' - ACGGAGCCATGGATTGCACATTG -3'<br>5' - TACATCTTTAAAGCAGCGGGTGCCGATGGT -3' |
| Mouse SREBP-2        | 5' - ACCATTCTCCAGCAGTCCCGT -3'<br>5' - CCTCTCACAGTGACAGAAGGAGTT -3'         |
| HCV core             | 5' - GTCAGATCGTCGGTGGAGTT -3'<br>5' - GAGCCTTGGGGATAGGTTGT -3'              |
| Human VCP            | 5' - ATTGATCCTGCCATCCTCAG -3'<br>5' - AAGTCCACATCCTTGGAAC -3'               |
| Human AMFR           | 5' - CAGCTGCGTTACCTGTTCA -3'<br>5' - TCATTGTTGACAGCCAGCTC -3'               |
| Human STUB1          | 5' - TCATTGTTGACAGCCAGCTC -3'<br>5' - GCTCCTCAATGCTGTTCCAG -3'              |
| Human SYVN1          | 5' - GTGATGGGCAAGGTGTTCTT -3'<br>5' - CAAGTCTCTGTGACGGCGTA -3'              |
| Human TRC8           | 5' - GCATCGTGCTCCAGATCTTC -3'<br>5' - TGCAGCTAACAGAAAGGCTGA -3'             |
| Human RNF185         | 5' - GTCGGAGGTCTTACCCAACA -3'<br>5' - TCAGCGAAGCTCTGAGTGAA -3'              |
| Human PARK2          | 5' - GCATCTCCAGCTCAAGGAG -3'<br>5' - GCATCTCCAGCTCAAGGAG -3'                |
| Human TRIM13         | 5' - ACCCTGCCAAATACATCAGC -3'<br>5' - ACCCTGCCAAATACATCAGC -3'              |
| Human TMEM129        | 5' - TGACATCTGGCTGAACTCCA -3'<br>5' - GGACACAGCGGTTTTGAACG -3'              |
| Human RNF5           | 5' - TGGGATCAGCAGAGAGAAGG -3'<br>5' - GGTATCACCAAATGGCTGGA -3'              |
| Human BIP            | 5'-CGAGGAGGAGGACAAGAAGG-3'<br>5'-CACCTTGAACGGCAAGAACT-3'                    |
| Human CHOP           | 5'-GCACCTCCCAGAGCCCTCACTCTCC-3'<br>5'-GTCTACTCCAAGCCTTCCCCCTGCG-3'          |
| Human RNF5           | 5' - TGGGATCAGCAGAGAGAAGG -3'<br>5' - GGTATCACCAAATGGCTGGA -3'              |

### Reference for Supplementary information

1. Chen, L. *et al.* Differential Targeting of Prosurvival Bcl-2 Proteins by Their BH3-Only Ligands Allows Complementary Apoptotic Function. *Mol. Cell* **17**, 393–403 (2005).
2. Okamoto, K., Moriishi, K., Miyamura, T. & Matsuura, Y. Intramembrane proteolysis and endoplasmic reticulum retention of hepatitis C virus core protein. *J. Virol.* **78**, 6370–6380 (2004).
3. Tanaka, T. *et al.* Hallmarks of Hepatitis C Virus in Equine Hepacivirus. *J. Virol* **88**, 13352–13366 (2014).
4. Mori, Y. *et al.* Processing of Capsid Protein by Cathepsin L Plays a Crucial Role in Replication of Japanese Encephalitis Virus in Neural and Macrophage Cells. *J. Virol.* **81**, 8477–8487 (2007).
5. Morita, E. *et al.* Identification of human MVB12 proteins as ESCRT-I subunits that function in HIV budding. *Cell Host and Microbe* **2**, 41–53 (2007).
